# Supplementary material
Source: PubMed Central journal article supplement (PMC9541251)
Supplement: BJU-130-193-s002.pdf [file BJU-130-193-s002.pdf]

**Supplementary Table 1.** Details of the MRI protocols used for both sites and all the scanners.

## Siemens Skyra 3T HUS

| Sequence             | Slice thickness (mm) | Resolution (mm) | FOV     | b-values     | Acquisition time | Temporal resolution (s) | TE   | TR   | Flip angle |
|----------------------|----------------------|-----------------|---------|--------------|------------------|-------------------------|------|------|------------|
| T2 haste tra pelvis  | 5                    | 1,3 x 1,3       | 194x320 |              | 1:02             |                         | 95   | 1600 | 160        |
| T2 tse sag           | 3                    | 0,6 x 0,6       | 320x320 |              | 3:07             |                         | 101  | 8820 | 160        |
| T2 tse cor           | 3                    | 0,6 x 0,6       | 310x320 |              | 3:09             |                         | 101  | 7500 | 160        |
| T2 tse tra           | 3                    | 0,3 x 0,3       | 230x256 |              | 3:10             |                         | 86   | 4100 | 155        |
| ep2d diff zoomit tra | 3                    | 2 x 2           | 48x90   | 50, 400, 800 | 4:45             |                         | 71   | 4800 | 180        |
| calc                 |                      |                 |         | 1600         |                  |                         |      |      |            |
| T1 twist tra         | 4                    | 1,4 x 1,4       | 132x192 |              | 0:12             |                         | 3.29 | 7.37 | 12         |
| T1 twist dyn+c       | 4                    | 1,4 x 1,4       | 132x192 |              | 2:23             | 7                       | 3.29 | 7.37 | 12         |

## Siemens Skyra 3T Tampere University hospital Tauh

| Sequence                   | Slice thickness (mm) | Resolution (mm) | FOV       | b-values | Acquisition time | Temporal resolution (s) | TE   | TR   | Flip angle |
|----------------------------|----------------------|-----------------|-----------|----------|------------------|-------------------------|------|------|------------|
| T1 TSE tra pelvis          | 5                    | 1.1 x1.1        | 398 x 280 |          | 1:29             |                         | 12   | 873  | 160        |
| T2 tse sag                 | 3                    | 0,5 x 0,5       | 180x180   |          | 3:48             |                         | 107  | 8470 | 160        |
| T2 tse cor                 | 3                    | 0,5 x 0,5       | 231x199   |          | 3:32             |                         | 92   | 6840 | 160        |
| T2 tse tra                 | 3                    | 0,5 x 0,5       | 199x199   |          | 4:38             |                         | 104  | 4760 | 160        |
| resolve_3scan_trace_tra    | 3                    | 1,6 x 1,6       | 260x260   | 0, 800   | 5:26             |                         | 73   | 4330 | 180        |
| resolve_3scan_trace_tra    | 3                    | 1,6 x1,6        | 260x260   | 1500     |                  |                         | 75   | 4330 | 180        |
| t1_vibe_tra_pre_flip_2deg  | 3,6                  | 1,4x 1,4        | 260x260   |          | 0:43             |                         | 1.39 | 4.1  | 2          |
| t1_vibe_tra_pre_flip_15deg | 3,6                  |                 |           |          | 0:32             |                         | 1.39 | 4.1  | 15         |
| t1_vibe_tra_dyn+C          | 3,6                  | 1,4 x 1,4       | 260x260   |          | 4:34             | 8                       | 1.77 | 4.9  | 15         |

Philips Achieva 3T HUS

| Sequence            | Slice thickness (mm) | Resolution (mm) | FOV     | b-values     | Acquisition time | Temporal resolution (s) | TE   | TR   | Flip angle |
|---------------------|----------------------|-----------------|---------|--------------|------------------|-------------------------|------|------|------------|
| T2 haste tra pelvis | 5                    | 0,9x0,9         | 380x340 |              | 0:41             |                         | 80   | 1251 | 90         |
| T2 tse sag          | 3                    | 0,5x0,5         | 200x200 |              | 3:59             |                         | 110  | 5710 | 90         |
| T2 tse cor          | 3                    | 0,4x0,4         | 160x160 |              | 5:41             |                         | 110  | 3369 | 90         |
| T2 tse tra          | 3                    | 0,3 x 0,3       | 160x160 |              | 4:35             |                         | 120  | 4836 | 90         |
| DWI                 | 3                    | 0,9 x 0,9       | 180x180 | 50, 400, 800 | 3:13             |                         | 63   | 4239 | 90         |
|                     |                      |                 | 180x180 | 2000         | 2:28             |                         | 78   | 4000 | 90         |
| T1 e-thrive         | 4                    | 0,75x0,75       | 180x180 |              | 2:32             |                         | 1.54 | 2.93 | 10         |
| T1 e-thrive C+      | 4                    | 0,75x0,75       | 180x180 |              | 2:32             | 7                       | 1.54 | 2.93 | 10         |
